# Supplementary material for: Fluorogenic squaraine dimers for the flow cytometry detection of bacterial urinary tract infections
Source: Royal Society of Chemistry journal article supplement (doi:10.1039/d5sd00160a), 2025-11-28
Supplement: d5sd00160a1.pdf [file d5sd00160a1.pdf]

## Supporting Information

### Fluorogenic squaraine dimers for the flow cytometry detection of urinary tract infections

Lucille Weiss,<sup>[a]</sup> Martijn Visser,<sup>[a]</sup> Patrick Wagner,<sup>[a]</sup> Anthony Augé,<sup>[a]</sup> Océane Florès,<sup>[a]</sup> Nicola Pordone,<sup>[b][c]</sup> Martin Fayolle,<sup>[b][c][d]</sup> Paul O. Verhoeven,<sup>[b][c][d]</sup> Dmytro Dziuba,<sup>[e]</sup> Dominique Bonnet,<sup>[a]</sup> Julie Karpenko<sup>[a,f]</sup>

<sup>[a]</sup> Laboratoire d'Innovation Thérapeutique, UMR7200 CNRS/Université de Strasbourg, Institut du Médicament de Strasbourg, F-67000 Strasbourg, France

<sup>[b]</sup> CIRI, Centre International de Recherche en Infectiologie, GIMAP Team, Université de Lyon, Université Jean Monnet St-Etienne, Inserm, U1111, CNRS, UMR5308, ENS Lyon, Université Claude Bernard Lyon 1, Lyon, France

<sup>[c]</sup> Faculté de Médecine, Université Jean Monnet St-Etienne, St-Etienne, France

<sup>[d]</sup> Service des Agents Infectieux et hygiène, Centre Hospitalier Universitaire de St-Etienne, St-Etienne, France

<sup>[e]</sup> Laboratoire de Bioimagerie et Pathologies, UMR7021 CNRS/Université de Strasbourg, F-67000 Strasbourg, France

<sup>[f]</sup> Institut universitaire de France (IUF)

## Table of Contents

|     |                                                              |    |
|-----|--------------------------------------------------------------|----|
| 1.  | Additional schemes, figures, and tables .....                | 3  |
| 2.  | Chemical synthesis.....                                      | 6  |
| 2.1 | General methods.....                                         | 6  |
| 2.2 | Synthesis of squaraines.....                                 | 6  |
| 2.3 | Solid-phase peptide synthesis of LysN3-Ubi .....             | 13 |
| 2.4 | Synthesis of the linker 1 .....                              | 14 |
| 2.5 | Synthesis of the dimeric probes .....                        | 19 |
| 2.6 | Synthesis of the monomeric probe mSQC8-Ubi.....              | 21 |
| 3.  | UV-vis absorption and fluorescence measurements .....        | 24 |
| 4.  | Bacterial strains .....                                      | 24 |
| 5.  | Mammalian cell culture .....                                 | 25 |
| 6.  | Fluorescence confocal microscopy .....                       | 25 |
| 7.  | Flow cytometry analysis of bacteria and HEK 293T cells ..... | 26 |
| 8.  | Flow cytometry analysis of patient urine samples .....       | 27 |
| 9.  | Ethics.....                                                  | 28 |
| 10. | Generative AI statement .....                                | 28 |
| 11. | References.....                                              | 28 |

## 1. Additional schemes, figures, and tables

**Table S1.** Photophysical properties of the dimeric and monomeric conjugates.

|                        | dSQEt-Ubi                                  |                                           |                      | dSQC8-Ubi                                  |                                           |                      | dSQ <sup>+</sup> -Ubi                      |                                           |                      | mSQC8-Ubi                                  |                                           |                      |
|------------------------|--------------------------------------------|-------------------------------------------|----------------------|--------------------------------------------|-------------------------------------------|----------------------|--------------------------------------------|-------------------------------------------|----------------------|--------------------------------------------|-------------------------------------------|----------------------|
|                        | $\lambda_{\text{abs}}$ , nm <sup>[a]</sup> | $\lambda_{\text{fl}}$ , nm <sup>[b]</sup> | QY, % <sup>[c]</sup> | $\lambda_{\text{abs}}$ , nm <sup>[a]</sup> | $\lambda_{\text{fl}}$ , nm <sup>[b]</sup> | QY, % <sup>[c]</sup> | $\lambda_{\text{abs}}$ , nm <sup>[a]</sup> | $\lambda_{\text{fl}}$ , nm <sup>[b]</sup> | QY, % <sup>[c]</sup> | $\lambda_{\text{abs}}$ , nm <sup>[a]</sup> | $\lambda_{\text{fl}}$ , nm <sup>[b]</sup> | QY, % <sup>[c]</sup> |
| DMSO                   | 644                                        | 653                                       | 21 ± 0.7             | 645                                        | 654                                       | 26 ± 2.2             | 644                                        | 653                                       | 24 ± 0.7             | 645                                        | 653                                       | 31 ± 1.5             |
| EtOH                   | 632                                        | 641                                       | 12 ± 1.4             | 634                                        | 642                                       | 17 ± 1.6             | 632                                        | 641                                       | 17 ± 2.6             | 636                                        | 641                                       | 22 ± 1.7             |
| MeOH                   | 629                                        | 638                                       | 5.4 ± 0.3            | 631                                        | 640                                       | 7.6 ± 0.4            | 630                                        | 639                                       | 7.5 ± 0.5            | 631                                        | 639                                       | 12 ± 0.6             |
| Water                  | 585                                        | 640                                       | 0.5 ± 0.3            | 589<br>629                                 | 639                                       | 1.5 ± 0.7            | 584                                        | 639                                       | 0.6 ± 0.4            | 631                                        | 641                                       | 10 ± 2.8             |
| PBS <sup>[d]</sup>     | 585                                        | 640                                       | 0.5 ± 0.4            | 591<br>633                                 | 639                                       | 0.7 ± 0.4            | 586                                        | 640                                       | 0.8 ± 0.3            | 631                                        | 641                                       | 10 ± 1.2             |
| Turn-on <sup>[e]</sup> | 42                                         |                                           |                      | 37                                         |                                           |                      | 31                                         |                                           |                      | 3                                          |                                           |                      |

<sup>[a]</sup> Position of the maximum absorption wavelength. <sup>[b]</sup> Position of the maximum emission wavelength. <sup>[c]</sup> Fluorescence quantum yields expressed as mean from three independent experiments ± SD. <sup>[d]</sup> Phosphate-buffered saline. <sup>[e]</sup> Fluorescence turn-on, calculated as a ratio of fluorescence quantum yields in DMSO and PBS.

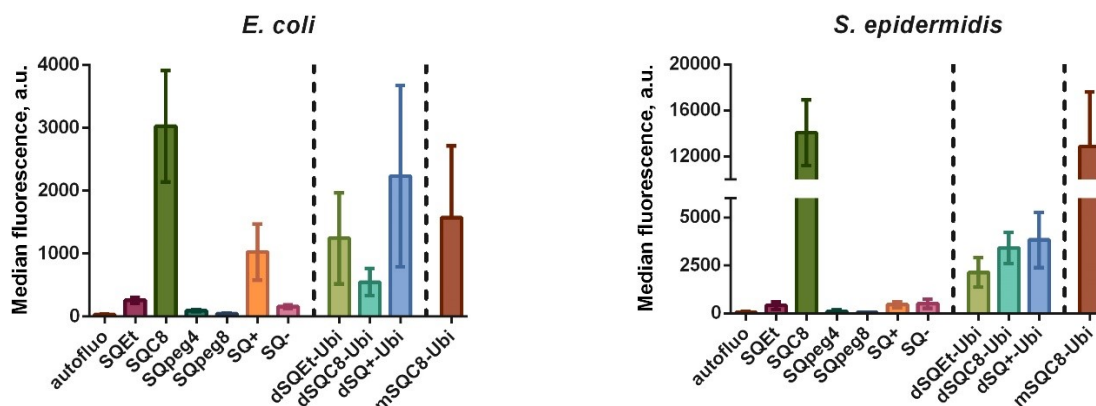

**Figure S1.** Median fluorescence intensities of the bacteria stained with 1  $\mu\text{M}$  of squaraines **SQEt**, **SQC8**, **SQpeg4**, **SQpeg8**, **SQ<sup>+</sup>** and **SQ<sup>-</sup>**; dimeric probes **dSQEt-Ubi**, **dSQC8-Ubi** and **dSQ<sup>+</sup>-Ubi** and the monomeric probe **mSQC8-Ubi**; error bars represent standard deviation for  $n \geq 3$  biological replicates.

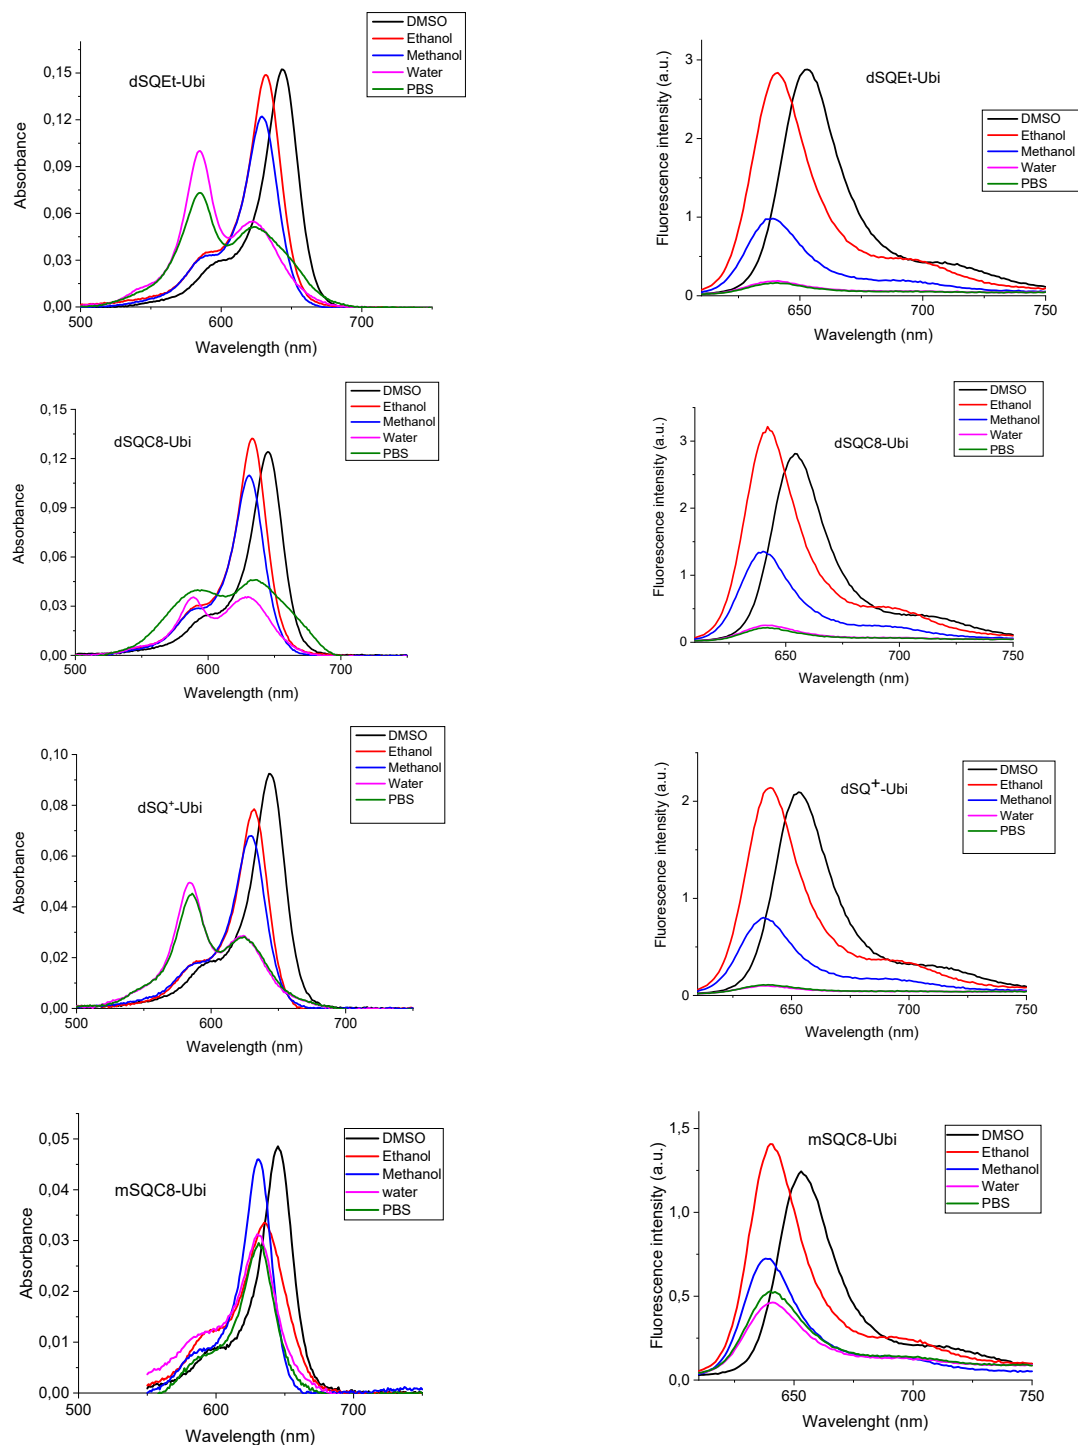

**Figure S2.** Absorption and fluorescence emission spectra of **dSQEt-Ubi**, **dSQC8-Ubi** and **dSQ<sup>+</sup>-Ubi** (200 nM) and **mSQC8-Ubi** (400 nM) in organic and aqueous solvents;  $\lambda_{\text{ex}}$  = 600 nm. PBS – phosphate-buffered saline.

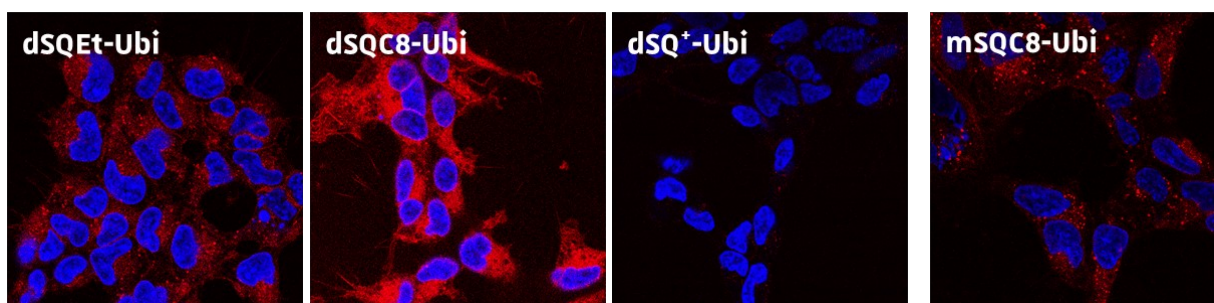

**Figure S3.** Confocal fluorescence microscopy images of live HEK293T cells stained with 1  $\mu$ M of bacteria-targeting probes, retreated separately from the images of unconjugated squaraines using adjusted brightness and contrast settings. The images in each channel were recorded using identical instrumental settings.

**Table S2.** Characterization of the patient urine samples.

| Sample code | RBC/mL <sup>[a]</sup> | WBC/mL <sup>[b]</sup> | Bacteria detected by the traditional culture-based approach <sup>[c]</sup> |                                                  | Bacterial load (cells/ $\mu$ L) estimated by rapid flow cytometry with dSQ <sup>+</sup> -Ubi |
|-------------|-----------------------|-----------------------|----------------------------------------------------------------------------|--------------------------------------------------|----------------------------------------------------------------------------------------------|
| 98AA        | 2000                  | 1000                  | sterile                                                                    |                                                  | 1738                                                                                         |
| 101CL       | 4000                  | 23000                 | sterile                                                                    |                                                  | 965                                                                                          |
| 109DJ       | 11000                 | 1000                  | sterile                                                                    |                                                  | 1334                                                                                         |
| 71DJ        | 1000                  | 2000                  | 10 <sup>4</sup> CFU/mL of <i>P. mirabilis</i>                              |                                                  | 3883                                                                                         |
| 114SM       | 5000                  | 41000                 | 10 <sup>4</sup> CFU/mL of <i>S. saprophyticus</i>                          |                                                  | 3304                                                                                         |
| 111SS       | 30000                 | 6586000               | 10 <sup>6</sup> CFU/mL of <i>K. pneumoniae</i>                             | 10 <sup>6</sup> CFU/mL of <i>E. coli</i>         | 7060                                                                                         |
| 32TY        | 38000                 | 1571000               | 10 <sup>7</sup> CFU/mL of <i>E. coli</i>                                   |                                                  | 16150                                                                                        |
| 92YY        | 4000                  | 33000                 | 10 <sup>4</sup> CFU/mL of <i>E. coli</i>                                   | 10 <sup>5</sup> CFU/mL of <i>S. gallolyticus</i> | 10167                                                                                        |
| 115PP       | 4319000               | 951000                | 10 <sup>6</sup> CFU/mL of <i>K. pneumoniae</i>                             |                                                  | 6425                                                                                         |
| 82PJ        | 6000                  | 176000                | 10 <sup>7</sup> CFU/mL of <i>K. pneumoniae</i>                             |                                                  | 17456                                                                                        |
| 4AR         | 2025000               | 785000                | 10 <sup>4</sup> CFU/mL of <i>E. faecium</i>                                |                                                  | 7133                                                                                         |
| 87CM        | 13000                 | 20000                 | 10 <sup>7</sup> CFU/mL of <i>E. faecalis</i>                               |                                                  | 2885                                                                                         |
| 87DS        | 6000                  | 182000                | 10 <sup>6</sup> CFU/mL of <i>E. coli</i>                                   |                                                  | 3786                                                                                         |
| 44BM        | 4000                  | 20400                 | 10 <sup>7</sup> CFU/mL of <i>E. coli</i>                                   |                                                  | 8571                                                                                         |
| 63DJ        | 554000                | 9292000               | 10 <sup>5</sup> CFU/mL of <i>C. koseri</i>                                 |                                                  | 10643                                                                                        |
| 60DP        | 4000                  | 444000                | 10 <sup>6</sup> CFU/mL of <i>E. coli</i>                                   |                                                  | 6369                                                                                         |

[a] Red blood cells per mL. [b] White blood cells per mL. [c] Incubation on *Brilliance*<sup>™</sup> UTI Clarity<sup>™</sup> Agar plates for 24 hours followed by the detection of individual colony-forming strains by MALDI-TOF; CFU = colony-forming unit.

## 2. Chemical synthesis

### 2.1 General methods

Chemicals and reagents were obtained from commercial sources (MilliporeSigma, Fluorochem Ltd, TCI Europe N.V.) and used without further purification. Solvents were obtained from commercial sources (Carlo Erba Reagents GmbH, MilliporeSigma) and used as supplied. Fmoc-L-amino acids for peptide synthesis were purchased from Iris Biotech GmbH. Fmoc-protected Rink-amide resin was purchased from MilliporeSigma and the overall yields for the solid-phase synthesis were calculated based on the initial loading capacity provided by the supplier.

Reactions were monitored by analytical reverse-phase high-performance liquid chromatography (RP-HPLC), performed on an Agilent Technologies 1200 series HPLC system equipped with a C18 Kinetex column (5  $\mu$ m, 4.6 mm  $\times$  150 mm) using a linear gradient (5% to 95% in 7.39 min, flow rate of 1.5 mL $\cdot$ min<sup>-1</sup>) of MeCN with 0.1% TFA (v/v) in H<sub>2</sub>O with 0.1% TFA (v/v) with detection at 220 nm, 254 nm, 365 nm and 630 nm.

Low-resolution mass spectra (LRMS) and high-resolution mass spectra (HRMS) were obtained on an Agilent Technologie 6520 Accurare-Mass Q-TOF LC/MS apparatus equipped with a Zorbax SB C18 column (1.8  $\mu$ m, 2.1  $\times$  50 mm) using electrospray ionization (ESI) and a time-of-flight analyzer (TOF).

Automated SPPS was carried out using a Liberty Blue synthesizer (CEM, France).

Semi-preparative reversed-phase HPLC chromatography was performed on a Gilson PLC2050 system equipped with a SunFire C18 column (5  $\mu$ m, 19  $\times$  150 mm) using a linear gradient (5% to 95% in 40 min, the flow rate of 18 mL $\cdot$ min<sup>-1</sup>) of MeCN with 0.1% TFA (v/v) in H<sub>2</sub>O with 0.1% TFA (v/v).

Nuclear magnetic resonance (NMR) spectra were recorded on Bruker Avance III 400MHz, 500MHz or 700MHz BBFO+ probe spectrometer at 25°C. Deuterated solvents were purchased from Sigma-Aldrich. Chemical shifts are reported in ppm ( $\delta$ ), relatively to residual solvent.

### 2.2 Synthesis of squaraines

**SQEt** and **SQpeg4** were synthesized following the protocol described by Karpenko, et al.<sup>1</sup> *N*-alkylated trimethylindolenines **5**,<sup>2</sup> **8**,<sup>3</sup> and **10**<sup>4</sup> were synthesized following the published protocols.

The synthesis of **SQpeg8**, **SQ<sup>+</sup>**, and **SQ<sup>-</sup>**, which followed the classical three-step approach (saponification, condensation, and acid hydrolysis), is described below. As for **SQC8**, its synthesis following the three-steps approach resulted in a very low yield (< 10%), so an alternative two-steps approach (condensation followed by saponification) was proposed as presented below.

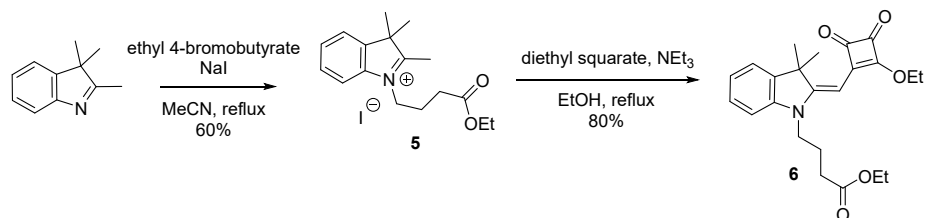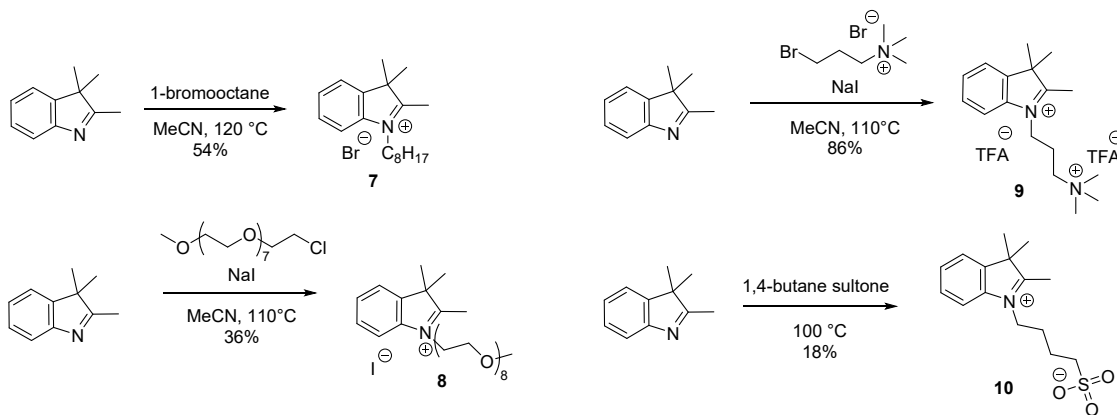

#### Three-steps synthetic approach

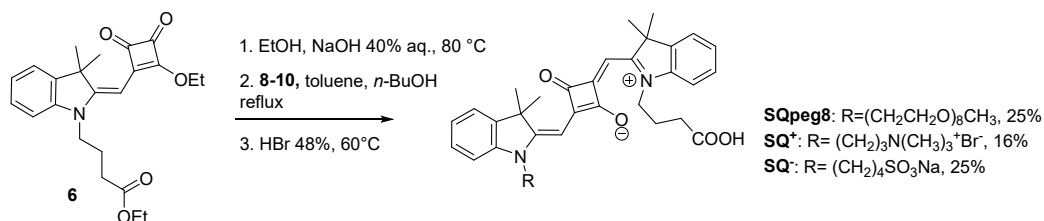

#### Two-steps synthetic approach

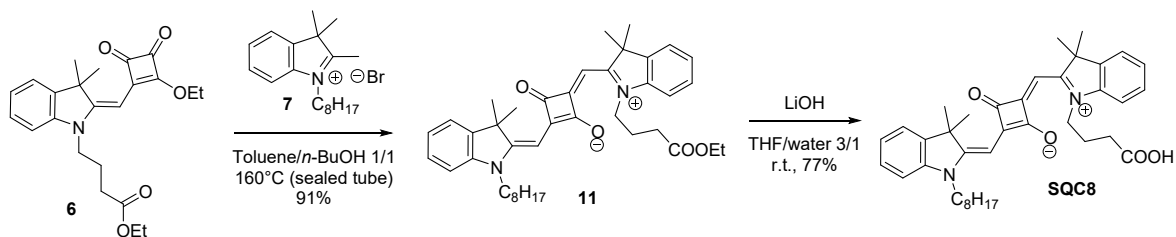

**Ethyl 4-(2-((2-ethoxy-3,4-dioxocyclobut-1-en-1-yl)methylene)-3,3-dimethylindolin-1-yl)butanoate (6)**

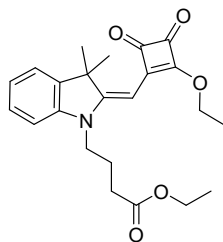

*N*-alkylated trimethylindolenine **5** (1.0 g, 2.8 mmol, 1 eq.) and 3,4-diethoxy-3-cyclobutene-1,2-dione (1.9 g, 11 mmol, 4 eq.) were dissolved in absolute EtOH (33 mL). The reaction mixture was refluxed overnight and turned orange before becoming green. Solvent was removed under reduced pressure and the product was purified over a SiO<sub>2</sub> gel column with DCM. The orange solid was recrystallized from MeOH, yielding **6** as thin orange needles (900 mg, 80%). HPLC *t<sub>r</sub>* = 5.17 min (> 95% purity [365 nm] [220 nm]). HRMS (ESI) calculated for C<sub>23</sub>H<sub>28</sub>NO<sub>5</sub> [M+H]<sup>+</sup>: 397.1889; found: 397.1878. Calculated error: 2.8 ppm.

<sup>1</sup>H NMR (400 MHz, CDCl<sub>3</sub>) δ 7.31 – 7.22 (m, 2H), 7.07 (td, *J* = 7.4, 0.9 Hz, 1H), 6.98 – 6.92 (m, 1H), 5.42 (s, 1H), 4.90 (q, *J* = 7.1 Hz, 2H), 4.17 (q, *J* = 7.1 Hz, 2H), 3.95 – 3.86 (m, 2H), 2.43 (t, *J* = 6.9 Hz, 2H), 2.07 (quint, *J* = 7.0 Hz, 2H), 1.62 (s, 6H), 1.53 (t, *J* = 7.1 Hz, 3H), 1.27 (t, *J* = 7.1 Hz, 3H).

<sup>13</sup>C NMR (101 MHz, CDCl<sub>3</sub>) δ 192.4, 187.70, 187.68, 173.8, 172.6, 168.2, 142.6, 140.8, 127.9, 122.8, 122.0, 108.4, 81.4, 70.0, 60.8, 48.0, 41.9, 30.9, 27.0, 21.4, 15.9, 14.2.

**2,3,3-Trimethyl-1-octyl-3H-indol-1-ium bromide (7)**

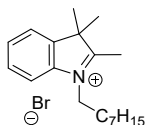

**7** was synthesized following a modified procedure from the literature.<sup>5</sup> 2,3,3-Trimethylindolenine (250 mg, 1.6 mmol, 1 eq.) and 1-bromooctane (910 mg, 4.7 mmol, 3 eq.) were dissolved in dry acetonitrile (2 mL) in a sealed tube. The solution was heated at 120 °C for 48 h. The solvent was removed under vacuum and the crude reaction mixture was triturated using cold diethyl ether and cold ethyl acetate. The product was further dried under vacuum to yield **7** as a purple solid (300 mg, 54%).



$^1\text{H}$  NMR (400 MHz,  $\text{CDCl}_3$ )  $\delta$  7.64 – 7.53 (m, 4H), 4.75 (t,  $J$  = 7.8 Hz, 2H), 3.14 (s, 3H), 1.92 (m, 2H), 1.65 (s, 6H), 1.50 – 1.18 (m, 10H), 0.90 – 0.82 (m, 3H).

**2,3,3-Trimethyl-1-(3-(trimethylammonio)-propyl)-3H-indolium iodide (9)**

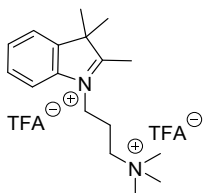

**9** was synthesized according to a modified procedure from the literature.<sup>4,6</sup> In a sealed tube, to a solution of 2,3,3-trimethylindolenine (0.5 g, 3.1 mmol, 1 eq.) and NaI (2.3 g, 16 mmol, 5 eq.) in MeCN (4 mL) was added (3-bromopropyl)trimethylammonium bromide (1.2 g, 4.6 mmol, 1.5 eq.). The reaction mixture was stirred at 110 °C for 70 h. MeCN was removed under reduced pressure. The crude product was dissolved in DMSO and was purified by reverse phase semi-preparative chromatography using a constant 5% gradient for 10 min then a linear gradient of 5-40% v/v MeCN (0.1% v/v TFA) in  $\text{H}_2\text{O}$  (0.1% v/v TFA) in 30 min. The combined fractions were freeze-dried to afford **9** as a yellow oil (1.2 g, 86%). HPLC  $t_r$  = 1.56 min (> 95% purity [220 nm] [254 nm]).

$^1\text{H}$  NMR (400 MHz,  $\text{CD}_3\text{OD}$ )  $\delta$  8.10 – 8.01 (m, 1H), 7.84 – 7.75 (m, 1H), 7.72 – 7.64 (m, 2H), 4.62 (t,  $J$  = 8.3 Hz, 2H), 3.85 – 3.73 (m, 2H), 3.24 (s, 9H), 2.61 – 2.44 (m, 2H), 1.65 (s, 6H).

**4-((1-(3-carboxypropyl)-3,3-dimethyl-3H-indol-1-ium-2-yl)methylene)-2-((3,3-dimethyl-1-(2,5,8,11,14,17,20,23-octaoxapentacosan-25-yl)indolin-2-ylidene)methyl)-3-oxocyclobut-1-en-1-olate (SQpeg8)**

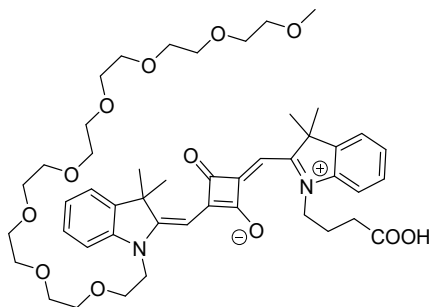

To a solution of **6** (32 mg, 0.08 mmol, 1 eq.) in ethanol (5 mL) was added NaOH (40% in water, 500  $\mu\text{L}$ , 5 mmol, 62 eq.). The solution was heated at 80 °C for 3 h, cooled, then neutralized with

6 M HCl. The solution was filtered over silica gel, washed with DCM and MeOH (90:10) and the solvents were evaporated. The crude product was dissolved in a toluene/*n*-butanol mixture (1:1, 4 mL) and **8** (52 mg, 0.08 mmol, 1 eq.) was added. The reaction mixture was refluxed overnight in a flask equipped with a Dean-Stark apparatus. Solvents were evaporated and the crude product was taken in water and 48% HBr (1:1, 10 mL) and heated at 60 °C for 1 h. The solution was cooled and then extracted with DCM until the aqueous phase was no longer blue. The organic layer was dried over anhydrous MgSO<sub>4</sub>. Solvents were removed under vacuum. The product was purified by reverse phase HPLC using a C18 column and a linear gradient of MeCN with 0.1% TFA (v/v) in H<sub>2</sub>O with 0.1% TFA (v/v) at 20% for 3 min then 20% to 90% in 30 min with a flow rate of 20 mL.min<sup>-1</sup>. Detection was set at 600 nm. Fractions with the desired compound were freeze-dried to yield **SQpeg8** as a blue solid (17 mg, 25%). HPLC *t<sub>r</sub>* = 5.08 min (> 95% purity [630 nm]). HRMS (ESI) calculated for C<sub>47</sub>H<sub>65</sub>N<sub>2</sub>O<sub>12</sub> [M+H]<sup>+</sup>: 849.4538 ; found: 849.4543. Calculated error: 0.6 ppm.

<sup>1</sup>H NMR (500 MHz, CD<sub>3</sub>OD) δ 7.44 (t, *J* = 6.6 Hz, 2H), 7.39 – 7.27 (m, 4H), 7.19 (td, *J* = 7.4, 3.6 Hz, 2H), 6.03 (s, 1H), 5.98 (s, 1H), 4.36 (t, *J* = 5.3 Hz, 2H), 4.18 (t, *J* = 7.8 Hz, 2H), 3.91 (t, *J* = 5.3 Hz, 2H), 3.68 – 3.47 (m, 28H), 3.33 (s, 3H), 2.52 (t, *J* = 6.9 Hz, 2H), 2.08 (quint, *J* = 7.1 Hz, 2H), 1.82 – 1.71 (m, 12H).

<sup>13</sup>C NMR (126 MHz, CD<sub>3</sub>OD) δ 184.5, 176.9, 176.7, 176.1, 172.9, 172.1, 144.2, 143.6, 143.2, 143.0, 129.3, 129.0, 125.4, 125.3, 123.3, 123.1, 112.2, 111.4, 87.7, 87.0, 72.9, 72.2, 71.65, 71.62, 71.50, 71.48, 71.3, 69.0, 59.1, 50.58, 50.56, 45.2, 43.9, 31.5, 27.4, 27.4, 23.2.

**4-((1-(3-carboxypropyl)-3,3-dimethyl-3*H*-indol-1-ium-2-yl)methylene)-2-((3,3-dimethyl-1-(3-(trimethylammonio)propyl)indolin-2-ylidene)methyl)-3-oxocyclobut-1-en-1-olate (SQ<sup>+</sup>)**

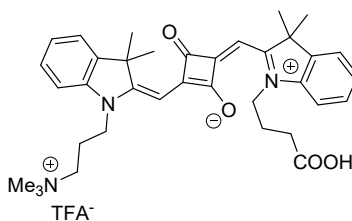

To a solution of **6** (145 mg, 0.36 mmol, 1.0 eq.) in ethanol (5 mL) was added NaOH (40% in water, 500 µL). The solution was heated at 80 °C for 3 h and cooled before neutralizing the solution with 6 M HCl. The solution was filtered over silica gel, washed with DCM and MeOH (90:10) and the solvents were evaporated. The crude product was dissolved in a toluene/*n*-butanol mixture (1:1, 4 mL) and **9** (133 mg, 0.50 mmol, 1.4 eq.) was added. The reaction mixture was refluxed overnight

in a flask equipped with a Dean-Stark apparatus. Solvents were evaporated and the crude product was taken in water and 48% HBr (2:1, 10 mL) and heated at 60 °C for 1 h. The solution was cooled and then extracted with DCM until the aqueous phase was no longer blue. The organic layer was dried over anhydrous MgSO<sub>4</sub>. Solvents were removed under vacuum. The crude product was purified by reverse phase HPLC using a C18 column and a linear gradient of MeCN with 0.1% TFA (v/v) in H<sub>2</sub>O with 0.1% TFA (v/v) at 20% for 3 min then 20% to 90% in 30 min with a flow rate of 20 mL.min<sup>-1</sup>. Detection was set at 600 nm. Fractions with the desired compound were freeze-dried to yield **SQ+** as a blue solid (33 mg, 16%). HPLC *t<sub>r</sub>* = 4.67 min (> 95% purity [630 nm]). HRMS (ESI) calculated for C<sub>36</sub>H<sub>44</sub>N<sub>3</sub>O<sub>4</sub> [M]<sup>+</sup>: 582.3326; found: 582.3318. Calculated error: 1.4 ppm.

<sup>1</sup>H NMR (400 MHz, CD<sub>3</sub>OD) δ 7.55 – 7.43 (m, 2H), 7.43 – 7.33 (m, 3H), 7.33 – 7.14 (m, 3H), 6.05 (s, 1H), 5.88 (s, 1H), 4.31 – 4.08 (m, 4H), 3.66 – 3.51 (m, 2H), 3.19 (s, 9H), 2.54 (t, *J* = 6.9 Hz, 2H), 2.38 – 2.27 (m, 2H), 2.10 (quint, *J* = 7.1 Hz, 2H), 1.85 – 1.68 (m, 12H).

<sup>13</sup>C NMR (126 MHz, DMSO-*d*<sub>6</sub>) δ 181.2, 180.3, 174.2, 170.4, 168.9, 142.5, 142.0, 128.5, 128.4, 124.5, 124.1, 122.8, 110.9, 110.5, 86.8, 63.1, 52.9, 49.4, 49.1, 42.9, 31.0, 27.1, 26.9, 22.5, 20.9.

**4-(2-(((1-(3-carboxypropyl)-3,3-dimethyl-3*H*-indol-1-ium-2-yl)methylene)-2-oxido-4-oxocyclobut-1-en-1-yl)methylene)-3,3-dimethylindolin-1-yl)butane-1-sulfonate (**SQ**<sup>-</sup>)**

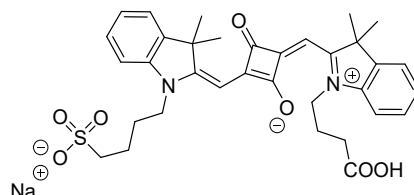

To a solution of **6** (105 mg, 0.26 mmol, 1 eq.) in ethanol (5 mL) was added NaOH (40% in water, 500 μL). The solution was heated at 80 °C for 3 h and cooled before adding 6 M HCl to neutralize the solution. The solution was filtered over silica gel, washed with DCM and MeOH (90:10) and the solvents were evaporated. The crude product was dissolved in a toluene/*n*-butanol mixture (1:1, 4 mL) and **10** (78 mg, 0.26 mmol, 1 eq.) was added. The reaction mixture was refluxed overnight in a flask equipped with a Dean-Stark apparatus. Solvents were evaporated and the crude product was heated at 60 °C for 3 h in water and 48% HBr (1:1, 5 mL). The solution was cooled and then extracted with DCM until the aqueous phase was no longer blue. The organic layer was dried over anhydrous MgSO<sub>4</sub>. Solvents were removed under vacuum. The product was purified by semi-preparative HPLC using a C18 column and a linear gradient of MeCN with 0.1%

TFA (v/v) in H<sub>2</sub>O with 0.1% TFA (v/v) at 20% for 3 min then 20% to 90% in 30 min with a flow rate of 20 mL.min<sup>-1</sup>. Detection was set at 600 nm. Fractions with the desired compound were freeze-dried to yield **SQ**- as a blue solid (17 mg, 25%). HPLC *t<sub>r</sub>* = 4.60 min (> 95% purity [630 nm]). HRMS (ESI) calculated for C<sub>34</sub>H<sub>39</sub>N<sub>2</sub>O<sub>7</sub>S<sup>-</sup> [M+2H]<sup>+</sup>: 619.2478; found: 619.2483. Calculated error: 0.8 ppm.

<sup>1</sup>H NMR (500 MHz, DMSO-d<sub>6</sub>) δ 7.52 (dd, *J* = 7.4, 3.4 Hz, 2H), 7.45 – 7.30 (m, 4H), 7.24 – 7.13 (m, 2H), 5.90 (s, 1H), 5.88 (s, 1H), 4.32 – 4.04 (m, 4H), 2.66 (t, *J* = 7.3 Hz, 2H), 2.41 (t, *J* = 7.1 Hz, 2H), 1.91 (quint, *J* = 7.1 Hz, 2H), 1.84 – 1.71 (m, 4H), 1.70 – 1.56 (m, 12H).

<sup>13</sup>C NMR (126 MHz, DMSO-d<sub>6</sub>) δ 174.3, 170.4, 170.1, 159.0, 158.7, 142.5, 141.99, 141.96, 128.5, 124.6, 124.5, 122.74, 122.72, 116.6, 111.2, 110.9, 86.8, 86.5, 51.1, 49.3, 43.5, 42.8, 40.7, 30.9, 26.8, 26.1, 22.7, 22.4.

**2-((3,3-dimethyl-1-octylindolin-2-ylidene)methyl)-4-((1-(4-ethoxy-4-oxobutyl)-3,3-dimethyl-3H-indol-1-ium-2-yl)methylene)-3-oxocyclobut-1-en-1-olate (11)**

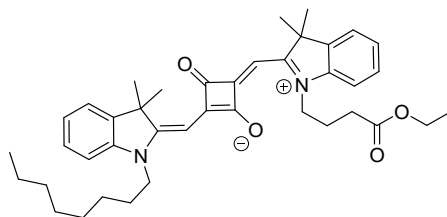

In a microwave-type tube, **6** (409 mg, 1.03 mmol, 1 eq.) and **7** (363 mg, 1.03 mmol, 1 eq.) were dissolved in a 1:1 mixture of toluene and *n*-butanol (20 mL). The tube was sealed and heated at 160 °C overnight. The solvents were removed under vacuum and the crude product was purified by column chromatography over silica gel (DCM to DCM/MeOH 90:10) to afford **11** as a blue solid (586 mg, 91%). *R<sub>f</sub>* = 0.8 (SiO<sub>2</sub>, DCM/MeOH 95:5). HRMS (ESI) calculated for C<sub>40</sub>H<sub>51</sub>N<sub>2</sub>O<sub>4</sub> [M+H]<sup>+</sup>: 623.3849, Found: 623.3847. Calculated error 0.3 ppm.

<sup>1</sup>H NMR (500 MHz, CD<sub>3</sub>OD) δ 7.44 (t, *J* = 7.0 Hz, 2H), 7.39 – 7.33 (m, 2H), 7.31 – 7.26 (m, 1H), 7.26 – 7.15 (m, 3H), 5.97 (s, 1H), 5.94 (s, 1H), 4.23 – 4.05 (m, 6H), 2.59 – 2.45 (m, 2H), 2.10 (quint, *J* = 7.1 Hz, 2H), 1.82 (quint, *J* = 7.5 Hz, 2H), 1.74 (s, 12H), 1.52 – 1.25 (m, 12H), 1.25 – 1.18 (m, 3H), 0.94 – 0.81 (m, 3H).

<sup>13</sup>C NMR (126 MHz, CD<sub>3</sub>OD) δ 185.2, 177.6, 176.8, 174.9, 173.2, 172.5, 144.3, 144.2, 143.9, 143.7, 129.83, 129.81, 126.1, 125.9, 112.1, 111.9, 87.8, 87.5, 62.3, 51.2, 51.1, 50.2, 50.1, 45.3, 44.4, 33.5, 32.3, 31.0, 30.9, 28.8, 28.5, 28.0, 27.9, 24.3, 23.7, 15.1, 15.0.

**4-((1-(3-carboxypropyl)-3,3-dimethyl-3*H*-indol-1-ium-2-yl)methylene)-2-((3,3-dimethyl-1-octylindolin-2-ylidene)methyl)-3-oxocyclobut-1-en-1-olate (SQC8)**

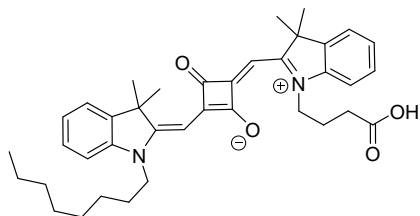

To a solution of **11** (560 mg, 0.9 mmol, 1 eq.) in THF (30 mL) and water (10 mL), lithium hydroxide monohydrate (76 mg, 1.8 mmol, 2 eq.) was added. The mixture was stirred overnight at room temperature. Solvents were removed under vacuum and the crude product was taken in DCM and washed with 0.5 M HCl. The organic layer was dried over MgSO<sub>4</sub>. The solvent was removed under vacuum. The product was purified by column chromatography over silica gel (DCM to DCM/MeOH 90:10) to afford the desired compound **SQC8** as a blue solid (410 mg, 77%). HPLC *t<sub>r</sub>* = 6.26 min (> 95% purity [650 nm] [220 nm]).

HRMS (ESI) calculated for C<sub>38</sub>H<sub>47</sub>N<sub>2</sub>O<sub>4</sub><sup>+</sup> [M+H]<sup>+</sup>: 594.3458, Found: 594.3476. Calculated error 3.0 ppm.

<sup>1</sup>H NMR (500 MHz, DMSO) δ 7.52 (d, *J* = 7.3 Hz, 2H), 7.40 – 7.30 (m, 4H), 7.20 – 7.12 (m, 2H), 5.84 (s, 1H), 5.80 (s, 1H), 4.17 – 4.03 (m, 4H), 2.38 (q, *J* = 8.0 Hz, 2H), 1.91 (t, *J* = 7.5 Hz, 2H), 1.68 (s, 12H), 1.40 – 1.19 (m, 12H), 0.83 (t, *J* = 6.6 Hz, 3H). The product was not soluble enough to obtain a proper <sup>13</sup>C NMR spectrum.

## 2.3 Solid-phase peptide synthesis of LysN3-Ubi

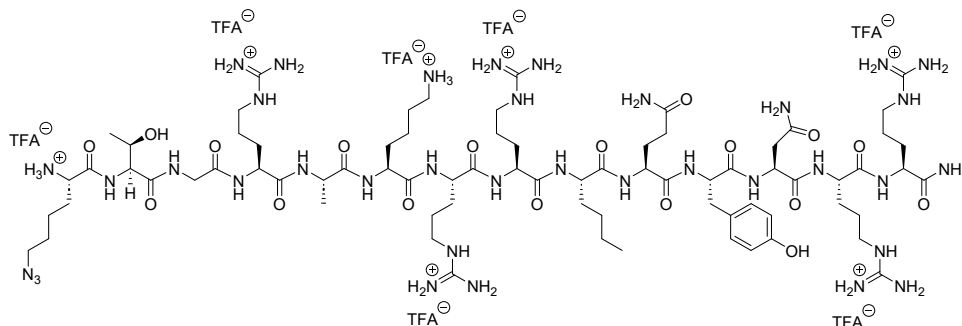

## 2.4 Synthesis of the linker 1

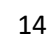

***tert*-Butyl (15-oxo-3,6,9,12-tetraoxa-16-azanonadec-18-yn-1-yl)carbamate (13)**

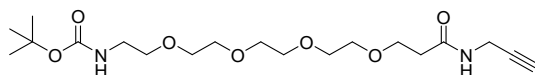

**13** was synthesized according to a modified procedure from the literature.<sup>7</sup> HATU (880 mg, 3.3 mmol, 1.2 eq.), DIEA (1.68 mL, 9.6 mmol, 5 eq.) and then propargylamine (0.25 mL, 3.9 mmol, 2 eq.) were added to a solution of Boc-15-amino-4,7,10,13-tetraoxapentadecanoic acid **12** (704 mg, 1.9 mmol, 1 eq.) in DMF (15 mL). The reaction mixture was stirred at room temperature for 2 h. Solvent was removed under reduced pressure, and the crude product was dissolved in DCM. The organic phase was washed twice with a 0.1 M HCl solution. The organic phase was dried over MgSO<sub>4</sub> and evaporated under reduced pressure. The product was purified over a silica gel column using a MeOH in DCM gradient (0:100 up to 10:90). Compound **13** was obtained as a sticky yellow solid (726 mg, 94%).

<sup>1</sup>H NMR (400 MHz, CDCl<sub>3</sub>) δ 6.86 (s, 1H), 5.04 (t, *J* = 6.0 Hz, 1H), 4.02 (dd, *J* = 5.4, 2.5 Hz, 2H), 3.73 (t, *J* = 5.6 Hz, 2H), 3.70 – 3.58 (m, 12H), 3.54 (t, *J* = 5.1 Hz, 2H), 3.31 (q, *J* = 5.5 Hz, 2H), 2.51 (t, *J* = 5.6 Hz, 2H), 2.19 (t, *J* = 2.6 Hz, 1H), 1.43 (s, 9H).

**1-Amino-*N*-(prop-2-yn-1-yl)-3,6,9,12-tetraoxapentadecan-15-amide (14)**

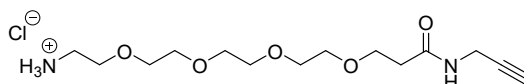

**13** (600 mg, 1.6 mmol, 1 eq.) was dissolved in a solution of 4 M HCl in dioxane (11 mL) and stirred at room temperature for 4 h. A precipitate was formed after 15 min. The precipitate was filtered and washed with cold diethyl ether to give **14** as a light orange solid (550 mg, 96%).

HRMS (ESI) calculated for C<sub>14</sub>H<sub>27</sub>N<sub>2</sub>O<sub>5</sub> [M+H]<sup>+</sup>: 303.1920; found: 303.1915. Calculated error: 1.6 ppm.

<sup>1</sup>H NMR (400 MHz, CDCl<sub>3</sub>) δ 8.17 (s, 1H), 7.97 (s, 2H), 4.03 (d, *J* = 2.5 Hz, 2H), 3.91 (t, *J* = 4.9 Hz, 2H), 3.83 (t, *J* = 5.9 Hz, 2H), 3.77 – 3.59 (m, 17H), 3.21 (q, *J* = 5.2 Hz, 2H), 2.69 (t, *J* = 5.9 Hz, 2H), 2.22 (t, *J* = 2.5 Hz, 1H). Traces of dioxane.

<sup>13</sup>C NMR (126 MHz, CDCl<sub>3</sub>) δ 171.4, 80.4, 71.1, 70.44, 70.36, 70.30, 70.1, 70.0, 69.97, 67.5, 67.0, 40.0, 36.2, 28.9.

**Di-*tert*-butyl (5,21-dioxo-8,11,14,17-tetraoxa-4,20-diazaheacos-1-yne-22,26-diyl)(S)-dicarbamate (15)**

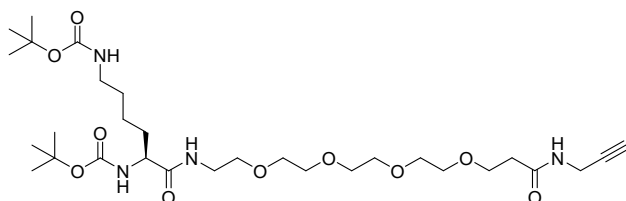

HATU (764 mg, 2.0 mmol, 1.1 eq.) and DIEA (960  $\mu$ L, 5.4 mol, 3.0 eq.) were added to a solution of **14** (550 mg, 1.8 mmol, 1.0 eq.) in DMF (10 mL). Commercial Boc-Lys(Boc)-OH·DCHA (697 mg, 2.0 mmol, 1.1 eq.) was then added and the reaction mixture was stirred at room temperature for 2 h. Solvents were removed under reduced pressure and the mixture was stirred in AcOEt (10 mL) and a 10% aqueous solution of citric acid (5 mL) until the solution became clear. The organic layer was washed with water and dried over  $\text{MgSO}_4$ . The product was purified over a silica gel column using a gradient of MeOH in DCM (0:10 to 1:9) to yield **15** as an oil (586 mg, 51%).

HRMS (ESI) calculated for  $\text{C}_{30}\text{H}_{55}\text{N}_4\text{O}_{10}$   $[\text{M}+\text{H}]^+$ : 631.3918; found: 631.3915. Calculated error: 0.5 ppm.

$^1\text{H}$  NMR (500 MHz,  $\text{CDCl}_3$ )  $\delta$  7.10 (s, 1H), 6.96 (s, 1H), 5.31 (d,  $J$  = 8.1 Hz, 1H), 4.73 (t,  $J$  = 5.9 Hz, 1H), 4.08 (s, 1H), 4.03 (dt,  $J$  = 4.5, 2.1 Hz, 2H), 3.81 – 3.58 (m, 14H), 3.54 (t,  $J$  = 5.1 Hz, 2H), 3.50 – 3.36 (m, 2H), 3.09 (q,  $J$  = 6.7 Hz, 2H), 2.51 (t,  $J$  = 5.9 Hz, 2H), 2.20 (t,  $J$  = 2.6 Hz, 1H), 1.88 – 1.25 (m, 29H).

$^{13}\text{C}$  NMR (126 MHz,  $\text{CDCl}_3$ )  $\delta$  172.3, 171.4, 156.3, 155.8, 80.2, 79.9, 79.2, 71.2, 70.7, 70.6, 70.4, 70.3, 70.0, 67.2, 54.4, 40.3, 39.4, 36.7, 32.8, 29.8, 29.0, 28.6, 28.5, 22.7.

**(S)-1-(2,6-Diaminohexanamido)-N-(prop-2-yn-1-yl)-3,6,9,12-tetraoxapentadecan-15-amide (16)**

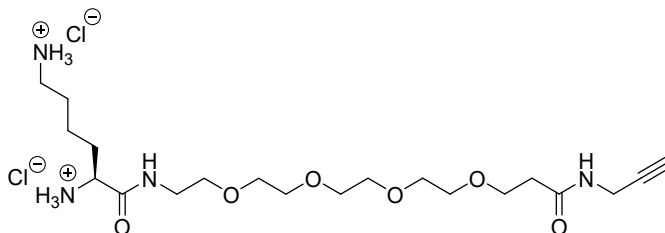



**15** (530 mg, 0.84 mmol) was dissolved in MeOH (2 mL) and a solution of 4 M HCl in dioxane (5 mL) was added. The reaction mixture was stirred at room temperature for 3 h. Solvents were removed under vacuum to afford **16** as a colorless oil (400 mg, 95%) that was used without further purification.

HRMS (ESI) calculated for  $C_{20}H_{39}N_4O_6$   $[M+H]^+$ : 431.2870; found: 431.2873. Calculated error: 0.8 ppm.

$^1H$  NMR (500 MHz,  $CD_3OD$ )  $\delta$  3.99 (d,  $J$  = 2.6 Hz, 2H), 3.94 (t,  $J$  = 6.6 Hz, 1H), 3.79 – 3.73 (m, 2H), 3.73 – 3.50 (m, 17H), 3.42 – 3.35 (m, 1H), 3.00 (t,  $J$  = 6.8 Hz, 2H), 2.64 (t,  $J$  = 2.5 Hz, 1H), 2.50 (t,  $J$  = 6.0 Hz, 2H), 1.99 – 1.89 (m, 2H), 1.80 – 1.71 (m, 2H), 1.58 – 1.48 (m, 2H). Traces of dioxane.

$^{13}C$  NMR (126 MHz,  $CD_3OD$ )  $\delta$  173.6, 170.0, 80.7, 72.3, 71.6, 71.5, 71.39, 71.37, 71.2, 71.0, 70.2, 68.12, 68.07, 54.2, 40.4, 40.3, 37.2, 31.9, 29.5, 28.0, 22.8.

**Di-*tert*-butyl(9,17-dioxo-11-((15-oxo-3,6,9,12-tetraoxa-16-azanonadec-18-yn-1-yl)carbamoyl)-3,6,20,23-tetraoxa-10,16-diazapentacosane-1,25-diyl)(*S*)-dicarbamate (17)**

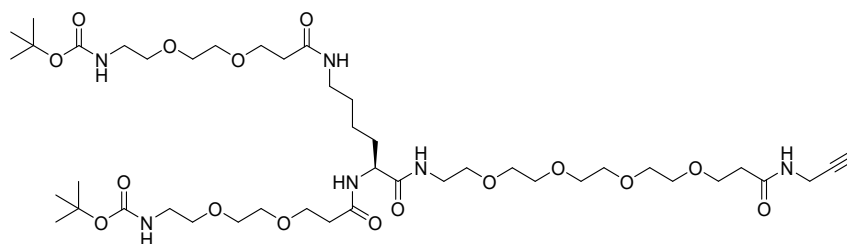

HATU (374 mg, 0.98 mmol, 2 eq.) and DIEA (430  $\mu$ L, 2.46 mmol, 5 eq.) were added to a solution of *t*-Boc-*N*-amido-PEG2-propionic acid (273 mg, 0.98 mmol, 2 eq.) and **16** (318 mg, 0.49 mmol, 1 eq.) in DMF (10 mL). The reaction mixture was stirred at room temperature for 2 h. Solvent was removed under reduced pressure, and the crude product was dissolved in DCM. The organic phase was washed twice with 0.1 M HCl and with brine. The organic phase was dried over  $MgSO_4$  and evaporated under reduced pressure. The product was purified over a silica gel column using a MeOH in DCM gradient (from 0:100 up to 10:90) to give **17** as a sticky pale-yellow oil (120 mg, 26%).

HRMS (ESI) calculated for  $C_{44}H_{81}N_6O_{16}$   $[M+H]^+$ : 949.5709; found: 949.5714. Calculated error: 0.5 ppm.

$^1\text{H}$  NMR (500 MHz,  $\text{CDCl}_3$ )  $\delta$  7.61 (s, 1H), 7.47 (s, 1H), 7.16 (s, 1H), 6.59 (s, 1H), 5.38 (s, 1H), 5.17 (s, 1H), 4.50 – 4.37 (m, 1H), 4.00 (dt,  $J$  = 5.5, 2.8 Hz, 2H), 3.82 – 3.67 (m, 7H), 3.67 – 3.54 (m, 19H), 3.52 (t,  $J$  = 5.2 Hz, 6H), 3.47 – 3.35 (m, 2H), 3.35 – 3.22 (m, 4H), 3.19 (q,  $J$  = 6.7 Hz, 2H), 2.51 (dt,  $J$  = 12.4, 6.0 Hz, 4H), 2.43 (t,  $J$  = 5.9 Hz, 2H), 2.21 (d,  $J$  = 5.1 Hz, 1H), 1.88 – 1.73 (m, 1H), 1.63 (dq,  $J$  = 14.6, 7.6 Hz, 1H), 1.56 – 1.26 (m, 23H).

$^{13}\text{C}$  NMR (126 MHz,  $\text{CDCl}_3$ )  $\delta$  171.8, 171.53, 171.46, 171.2, 156.2, 156.1, 80.2, 79.3, 79.1, 71.1, 70.5, 70.3-69.84 (multiple broad signals, PEG), 67.3, 67.2, 67.1, 52.8, 39.3, 38.9, 36.9, 36.4, 32.4, 29.0, 28.9, 28.44, 28.42, 22.5.

**(S)-N,N'-(5,21-Dioxo-8,11,14,17-tetraoxa-4,20-diazaheacos-1-yne-22,26-diyl)bis(3-(2-(2-aminoethoxy)ethoxy)propanamide) (1)**

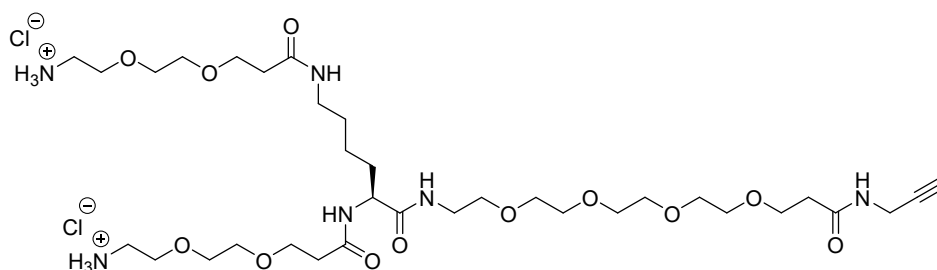

**17** (110 mg, 0.12 mmol, 1 eq.) was dissolved in a solution of 4 M HCl in dioxane (5 mL) and MeOH (2 mL) and stirred at room temperature for 5 h. Solvents were removed under vacuum to afford **1** as a transparent oil (97 mg, quantitative) that was used without further purification.

HRMS (ESI) calculated for  $\text{C}_{34}\text{H}_{66}\text{N}_6\text{O}_{12}$   $[\text{M}+2\text{H}]^{2+}/2$ : 375.2370; found: 375.2369. Calculated error: 0.1 ppm.

$^1\text{H}$  NMR (500 MHz,  $\text{CD}_3\text{OD}$ )  $\delta$  4.30 (dd,  $J$  = 8.8, 5.3 Hz, 1H), 3.97 (d,  $J$  = 2.5 Hz, 2H), 3.86 – 3.59 (m, 32H), 3.57 (t,  $J$  = 5.6 Hz, 2H), 3.41 – 3.36 (m, 2H), 3.35 (s, 1H), 3.19 (t,  $J$  = 6.9 Hz, 3H), 3.16 – 3.10 (m, 4H), 2.63 (t,  $J$  = 2.6 Hz, 1H), 2.62 – 2.52 (m, 3H), 2.48 (q,  $J$  = 6.2 Hz, 4H), 1.88 – 1.75 (m, 1H), 1.75 – 1.61 (m, 1H), 1.49 (quint,  $J$  = 7.6 Hz, 2H), 1.49 – 1.33 (m, 2H).

$^{13}\text{C}$  NMR (126 MHz,  $\text{CD}_3\text{OD}$ )  $\delta$  173.1, 172.6, 172.3, 172.2, 79.4, 71.0, 70.1-69.8 (multiple broad signals, PEG), 69.2, 66.5-66.37 (multiple broad signal, PEG), 53.5, 39.39, 39.36, 39.0, 38.7, 36.1, 35.9, 34.3, 34.2, 31.5, 28.6, 28.1, 22.8.

## 2.5 Synthesis of the dimeric probes

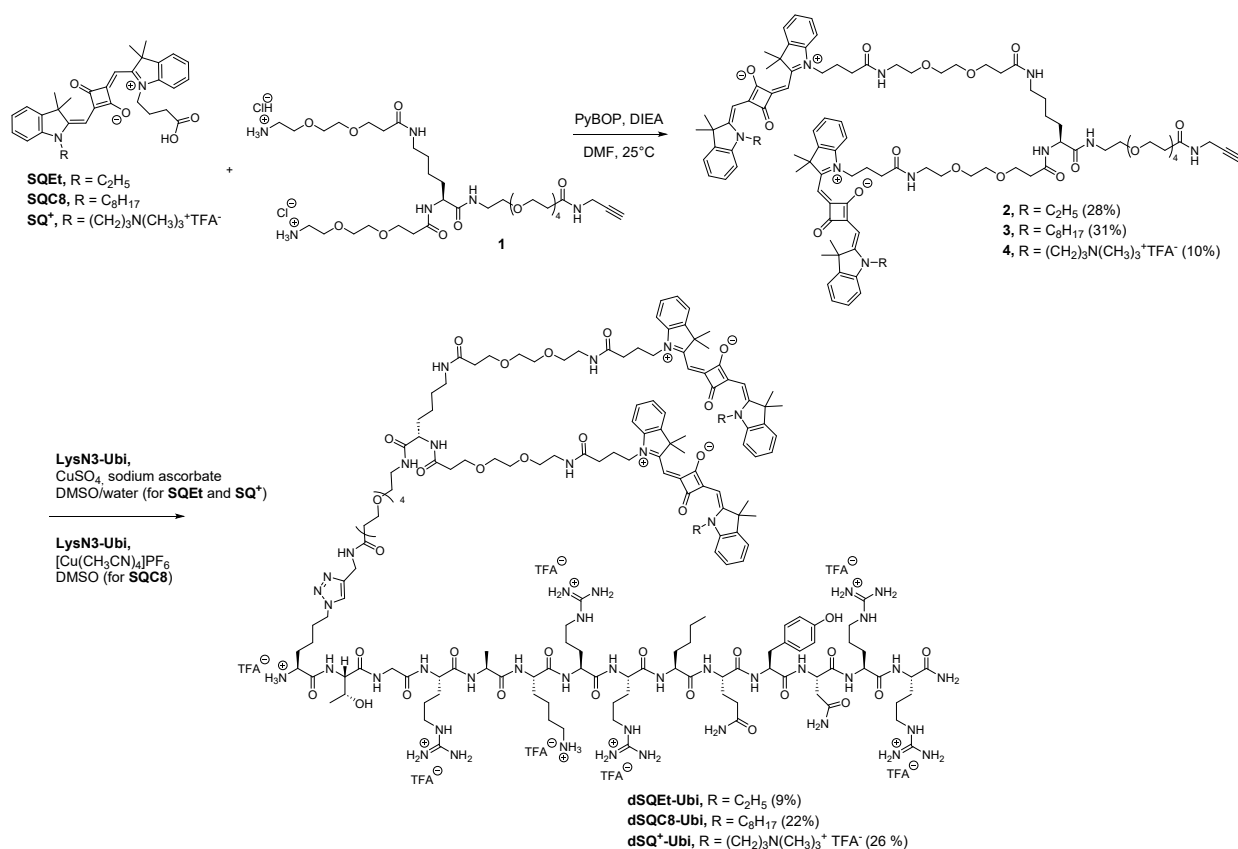

### General procedure for the synthesis of dimers 2, 3, and 4

To a solution of **1** (1.0 eq, typically 5 mg) and the corresponding squaraine (1.9 eq) in dry DMF (0.5 mL), PyBOP (3.0 eq) and DIEA (10 eq) were added. The reaction mixture was stirred at room temperature for 2 h. The resulting mixture was directly purified by semi-preparative reverse phase HPLC using a C18 column and a gradient of MeCN with 0.1% TFA (v/v) in H<sub>2</sub>O with 0.1% TFA (v/v) with a flow rate of 20 mL·min<sup>-1</sup>. Detection was set at 600 nm. Fractions containing the desired compound were freeze-dried to yield the dimers as blue solids.

**2**: Yield - 28%, HPLC t<sub>r</sub> = 5.96 min (> 95% purity [650 nm] [530 nm]). HRMS (ESI) calculated for C<sub>98</sub>H<sub>131</sub>N<sub>10</sub>O<sub>18</sub> [M+3H]<sup>3+</sup>/3: 578.6548; found: 578.6542. Calculated error: 0.9 ppm.

**3**: Yield - 31%, HPLC t<sub>r</sub> = 7.69 min (> 95% purity [650 nm] [220 nm]). HRMS (ESI) calculated for C<sub>110</sub>H<sub>152</sub>N<sub>10</sub>O<sub>18</sub>Na<sub>2</sub> [M+2Na]<sup>2+</sup>/2: 973.5541; found: 973.5528. Calculated error: 1.3 ppm.

**4**: Yield - 10%, HPLC t<sub>r</sub> = 4.79 min (> 90% purity [650 nm] [530 nm]). HRMS (ESI) calculated for C<sub>106</sub>H<sub>148</sub>N<sub>12</sub>O<sub>18</sub><sup>2+</sup> [M]<sup>2+</sup>/2: 938.5517; found: 938.5507. Calculated error: 1.1 ppm.

### **dSQEt-Ubi**

DMF and water were bubbled with argon before use. **LysN3-Ubi** (4.2 mg, 2.4  $\mu\text{mol}$ , 2.0 eq.) was dissolved in water (200  $\mu\text{L}$ ) and added to a solution of **2** (2 mg, 1.2  $\mu\text{mol}$ , 1.0 eq.) in DMF (150  $\mu\text{L}$ ). A freshly prepared solution of sodium ascorbate (10  $\text{mg}\cdot\text{mL}^{-1}$ , 52  $\mu\text{L}$ , 4.5 eq.) in water was added to a freshly prepared solution of  $\text{CuSO}_4\cdot 5\text{H}_2\text{O}$  (10  $\text{mg}\cdot\text{mL}^{-1}$ , 17  $\mu\text{L}$ , 1.5 eq.) in water. The resulting solution was immediately added to the peptide and dye mixture. The reaction solution was stirred under argon for 1 h at 37  $^\circ\text{C}$ . The solution was purified by semi-preparative reverse phase HPLC on a C18 column using a linear gradient of MeCN with 0.1% TFA (v/v) in  $\text{H}_2\text{O}$  with 0.1% TFA (v/v) (20% to 30% over 5 min then 30% to 60% over 30 min at the flow rate of 20  $\text{mL}\cdot\text{min}^{-1}$ ). Detection was set at 600 nm. Fractions with the desired compound were freeze-dried to yield **dSQEt-Ubi** as a blue solid (0.4 mg, 9%). HPLC  $t_r$  = 2.49 min (> 95% purity [650 nm] [220 nm]). HRMS (ESI) calculated for  $\text{C}_{173}\text{H}_{268}\text{N}_{46}\text{O}_{36}$   $[\text{M}+6\text{H}]^{6+}/6$ : 594.3426; found: 594.3439. Calculated error: 2.2 ppm.

### **dSQ<sup>+</sup>-Ubi**

**LysN3-Ubi** (2.7 mg, 1.5  $\mu\text{mol}$ , 1.1 eq.) and **4** (2.5 mg, 1.3  $\mu\text{mol}$ , 1.0 eq.) were dissolved in DMSO (300  $\mu\text{L}$ ), which was bubbled with argon. A freshly prepared solution of sodium ascorbate in water (10  $\text{mg}\cdot\text{mL}^{-1}$ , 119  $\mu\text{L}$ , 4.5 eq.) was added to a freshly prepared solution of  $\text{CuSO}_4\cdot 5\text{H}_2\text{O}$  in water (10  $\text{mg}\cdot\text{mL}^{-1}$ , 50  $\mu\text{L}$ , 1.5 eq.). The resulting solution was immediately added to the peptide and dye mixture. The reaction solution was stirred under argon for 30 min at 37  $^\circ\text{C}$ . The mixture was directly purified by semi-preparative reverse phase HPLC on a C18 column using a linear gradient of MeCN with 0.1% TFA (v/v) in  $\text{H}_2\text{O}$  with 0.1% TFA (v/v) (20% to 30% over 5 min then 30% to 60% over 30 min at the flow rate of 20  $\text{mL}\cdot\text{min}^{-1}$ ). Detection was set at 600 nm. Fractions with the desired compound were freeze-dried to yield **dSQ<sup>+</sup>-Ubi** as a blue solid (1.3 mg, 26%). HPLC  $t_r$  = 3.79 min (> 90% purity [650 nm] [530 nm]). HRMS (ESI) calculated for  $\text{C}_{181}\text{H}_{287}\text{N}_{48}\text{O}_{36}^{2+}$   $[\text{M}+5\text{H}]^{7+}/7$ : 618.0337; found: 618.2009. Calculated error: 2.7 ppm.

### **dSQC8-Ubi**

**LysN3-Ubi** (3.6 mg, 2.0  $\mu\text{mol}$ , 1.1 eq.) and **3** (3.4 mg, 1.8  $\mu\text{mol}$ , 1.0 eq.) were dissolved in DMSO bubbled with argon (400  $\mu\text{L}$ ), then tetrakis(acetonitrile)copper(I) hexafluorophosphate (0.6 mg, 1.8

$\mu\text{mol}$ , 1 eq.) was added. The reaction mixture was stirred at room temperature for 3 h. The crude mixture was purified by semi-preparative reverse phase flash chromatography on a C8 column using a linear gradient of MeCN with 0.1% TFA (v/v) in  $\text{H}_2\text{O}$  with 0.1% TFA (v/v) (15% to 80% over 30 min at the flow rate of  $10 \text{ mL}\cdot\text{min}^{-1}$ ). Detection was set at 600 nm. Fractions with the desired compound were freeze-dried to yield **dsQC8-Ubi** as a blue solid (1.5 mg, 22%). HPLC  $t_r$  = 3.51 min (> 95% purity [650 nm] [220 nm]). HRMS (ESI) calculated for  $\text{C}_{185}\text{H}_{286}\text{N}_{46}\text{O}_{36}$   $[\text{M}+3\text{H}]^{3+}/3$ : 1243.7399; found: 1243.7370. Calculated error: 2.4 ppm.

## 2.6 Synthesis of the monomeric probe mSQC8-Ubi

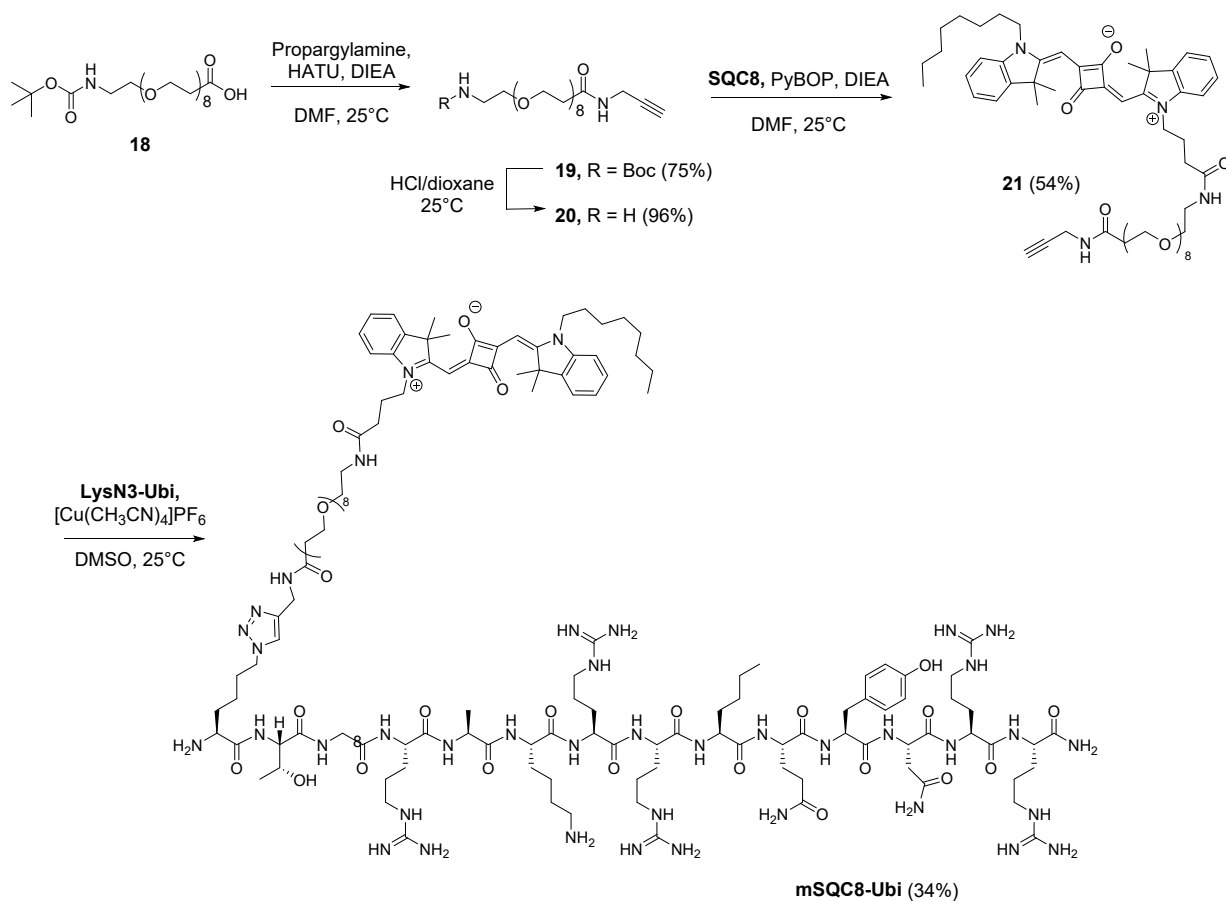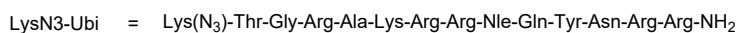

***tert*-butyl (27-oxo-3,6,9,12,15,18,21,24-octaoxa-28-azahentriacont-30-yn-1-yl) carbamate (19)**

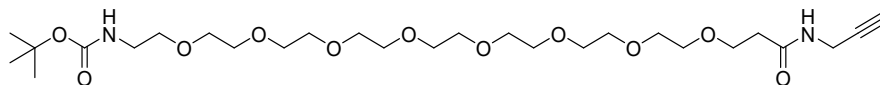

Propargylamine (12  $\mu$ L, 180  $\mu$ mol, 5 eq.) was added to a solution of Boc-NH-PEG8-CH<sub>2</sub>CH<sub>2</sub>COOH **18** (20 mg, 37  $\mu$ mol, 1 eq.) in DMF (0.5 mL). HATU (21 mg, 55  $\mu$ mol, 1.5 eq.) and DIEA (32  $\mu$ L, 180  $\mu$ mol, 5 eq.) were then added and the mixture was stirred at room temperature for 1 hour. Solvent was removed under reduced pressure. The crude was purified by column chromatography over silica gel (DCM to DCM/MeOH 90:10 to yield **19** as a colorless oil (16 mg, 75%).

HRMS (ESI) calculated for C<sub>34</sub>H<sub>66</sub>N<sub>6</sub>O<sub>12</sub> [M+2H]<sup>2+</sup>/2: 375.2370; found: 375.2369. Calculated error: 0.1 ppm.

<sup>1</sup>H NMR (500 MHz, CD<sub>3</sub>OD)  $\delta$  4.30 (dd, *J* = 8.8, 5.3 Hz, 1H), 3.97 (d, *J* = 2.5 Hz, 2H), 3.86 – 3.59 (m, 32H), 3.57 (t, *J* = 5.6 Hz, 2H), 3.41 – 3.36 (m, 2H), 3.35 (s, 1H), 3.19 (t, *J* = 6.9 Hz, 3H), 3.16 – 3.10 (m, 4H), 2.63 (t, *J* = 2.6 Hz, 1H), 2.62 – 2.52 (m, 3H), 2.48 (q, *J* = 6.2 Hz, 4H), 1.88 – 1.75 (m, 1H), 1.75 – 1.61 (m, 1H), 1.49 (quint, *J* = 7.6 Hz, 2H), 1.49 – 1.33 (m, 2H).

<sup>13</sup>C NMR (126 MHz, CD<sub>3</sub>OD)  $\delta$  173.1, 172.6, 172.3, 172.2, 79.4, 71.0, 70.1-69.8 (multiple broad signals, PEG), 69.2, 66.5-66.37 (multiple broad signal, PEG), 53.5, 39.39, 39.36, 39.0, 38.7, 36.1, 35.9, 34.3, 34.2, 31.5, 28.6, 28.1, 22.8.

**1-Amino-*N*-(prop-2-yn-1-yl)-3,6,9,12,15,18,21,24-octaoxaheptacosan-27-amide (20)**

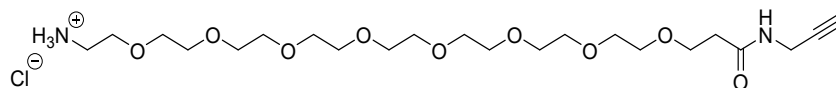

Compound **19** (16 mg, 28  $\mu$ mol) was dissolved in a solution of 4 M HCl in dioxane (4 mL). The solution was stirred at room temperature for 2 hours. Volatiles were removed under vacuum to give **20** as a colorless oil (14 mg, 96%) that was used without further purification.

<sup>1</sup>H NMR (500 MHz, CD<sub>3</sub>OD)  $\delta$  3.97 (d, *J* = 2.6 Hz, 2H), 3.81 – 3.62 (m, 31H), 3.17 (t, *J* = 5.1 Hz, 2H), 2.61 (t, *J* = 2.6 Hz, 1H), 2.47 (t, *J* = 6.1 Hz, 2H).

$^{13}\text{C}$  NMR (126 MHz, MeOD)  $\delta$  173.4, 80.7, 72.3, 71.5-71.1 (broad PEG signal), 71.0, 70.7, 68.0, 67.9, 49.5, 49.3, 40.6, 37.3, 29.4.

**(*E*)-2-(((*E*)-3,3-dimethyl-1-octylindolin-2-ylidene)methyl)-4-((1-(5,33-dioxo-8,11,14,17,20,23,26,29-octaoxa-4,32-diazahexatriacont-1-yn-36-yl)-3,3-dimethyl-3H-indol-1-ium-2-yl)methylene)-3-oxocyclobut-1-en-1-olate (21)**

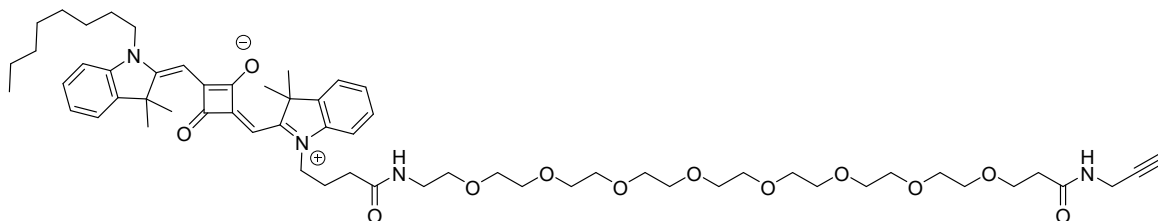

A mixture of **SQC8** (8 mg, 14  $\mu\text{mol}$ , 1 eq.), **20** (7 mg, 14  $\mu\text{mol}$ , 1 eq.), PyBOP (11 mg, 20  $\mu\text{mol}$ , 1.5 eq.) and DIEA (24  $\mu\text{L}$ , 140 mmol, 10 eq.) in DMF (1 mL) was stirred at room temperature for 1 hour. The crude was purified by reverse phase HPLC on a C18 column using a linear gradient of MeCN with 0.1% TFA (v/v) in  $\text{H}_2\text{O}$  with 0.1% TFA (v/v) (30% to 50% in 5 min, then 50% to 95% over 30 min at the flow rate of 20  $\text{mL}\cdot\text{min}^{-1}$ ). Detection was set at 600 nm. Fractions with desired compound were freeze-dried to yield product as a blue solid (8 mg, 54%). HPLC  $t_r$  = 5.17 min (> 95% purity [650 nm] [220 nm]). HRMS (ESI) calculated for  $\text{C}_{60}\text{H}_{88}\text{N}_4\text{O}_{12}$   $[\text{M}+2\text{H}]^{2+}/2$ : 528.3189; found: 528.3189. Calculated error: 2.0 ppm.

### mSQC8-Ubi

Tetrakis(acetonitrile)copper(I) tetrafluoroborate (0.4 mg, 1  $\mu\text{mol}$ , 1 eq.) was added to a solution of **LysN3-Ubi** (2 mg, 1.1  $\mu\text{mol}$ , 1.2 eq.) and **21** (1 mg, 1  $\mu\text{mol}$ , 1 eq.) in DMSO (400  $\mu\text{L}$ ) bubbled with argon. The reaction mixture was stirred under argon at room temperature overnight. The crude mixture was purified by semi-preparative reverse phase flash chromatography on a C8 column using a linear gradient of MeCN with 0.1% TFA (v/v) in  $\text{H}_2\text{O}$  with 0.1% TFA (v/v) (20% to 90% over 40 min at the flow rate of 10  $\text{mL}\cdot\text{min}^{-1}$ ). Detection was set at 600 nm. Fractions with the desired compound were freeze-dried to yield **mSQC8-Ubi** as a blue solid (1 mg, 34%). HPLC  $t_r$  = 2.65 min (> 95% purity [650 nm] [220 nm]). HRMS (ESI) calculated for  $\text{C}_{135}\text{H}_{220}\text{N}_{40}\text{O}_{30}$   $[\text{M}+5\text{H}]^{5+}/5$ : 577.3421; found: 577.3463. Calculated error: 0.2 ppm.

### 3. UV-vis absorption and fluorescence measurements

Spectroscopy-grade solvents were purchased from TCI or Merck. Hellma SUPRASIL 114F-QS 10 mm quartz cuvettes were used for spectroscopy measurements in organic solvents. Plastic Eppendorf semi-micro Vis Cuvettes were used for measurements in aqueous solutions.

Absorption spectra were recorded using a Shimadzu UV-2700i spectrometer. Fluorescence spectra were recorded using a FluoroMax4 spectrofluorometer (Jobin Yvon, Horiba). The excitation wavelength was 600 nm, with the recorded emission spectral ranges of 610–850 nm. Unless specified, all fluorescence spectra were corrected for instrumental factors. The absorbance of sample solutions at the excitation wavelength was kept below 0.05 to avoid inner filter effects. Determination of relative fluorescence quantum yields ( $\Phi_F$ ) was performed using DiD in MeOH as a reference ( $\Phi_F = 33\%$ ).<sup>8</sup> Data treatment was performed using OriginPro 2021.

The molar absorption coefficients of the dyes were determined using a serial dilution approach. Three independent samples of each dye were accurately weighed and dissolved in DMSO to prepare stock solutions at a concentration of 10 mM. Each stock solution was then diluted three times in MeOH to obtain a range of concentrations with absorbance values between 0.1 and 1. The absorbance of each solution was measured at the maximum absorption wavelength. Finally, the molar absorption coefficients were determined by calculating the slope of the absorbance versus concentration plot.

### 4. Bacterial strains

*Escherichia coli* K-12 (ATCC-10798) and *Staphylococcus epidermidis* (ATCC-14990) were purchased from LGC Standards S.a.r.l. (Molsheim, France). Luria-Bertani (LB) medium and agar from Athena Enzyme Systems were used for culturing bacteria.

Bacterial stocks were prepared as follows. Aliquots of the rehydrated bacteria were streaked on LB-agar plates and incubated for 18 hours at appropriate temperatures. Fresh LB medium (5 mL) was inoculated with single bacterial colonies and incubated at 30 °C, 220 rpm for 28 h. Glycerol stocks were prepared by adding a 50% v/v glycerol solution to the liquid bacterial culture (for a final concentration of glycerol 25% v/v) and stored at –80 °C.



## 5. Mammalian cell culture

HEK 293T cells were cultured in Eagle's minimal essential medium (MEM, Invitrogen, cat. no. 21090) supplemented with 10% FBS, 100 U·mL<sup>-1</sup> of penicillin, 100 µg·mL<sup>-1</sup> of streptomycin, 2 mM of glutamine, at 37 °C in a humidified 5% CO<sub>2</sub> atmosphere. A total of 70–80% maximal cell confluence was maintained by passing cells twice a week using the standard protocol.

## 6. Fluorescence confocal microscopy

*HEK 293T cells.* For microscopy experiments, cells were seeded into 35 mm ibiTreat µ-dishes (IBiDi) at 50,000 cells per dish 3 days before imaging. The day of the experiment, the culture medium was aspirated, and the cells were washed with DMEM/F-12 medium without phenol red. Cells were co-labeled with the squaraine fluorophores or conjugated probes (final concentration 1 µM) and Hoechst 33342 (final concentration 1 µg·mL<sup>-1</sup>) in DMEM/F-12 medium without phenol red for 15 min at 37 °C. Fluorescence confocal microscopy experiments were performed on a Leica TCS SP8 microscope equipped with a HCX PL APO CS2 63x/1.40 OIL objective. The imaging was performed at 22 °C. Squaraines and dimeric probes were excited with a 638 nm 30 mW laser at 0.1% or 1% intensity, and fluorescence was detected at 645–850 nm. Hoechst 33342 was excited with a 405 nm 50 mW laser, and its fluorescence was detected at 430–480 nm. The pinhole was set to 1 airy unit. The images were acquired at 1.5× magnification as a mean of 2 scans of 1024 × 1024 size. All images were processed with ImageJ. The same acquisition settings, brightness, and contrast parameters were applied to all the images.

*E. coli and S. epidermidis.* Two days before the experiment, glycerol stocks were streaked on LB-agar plates and incubated at 37 °C overnight. Fresh LB medium (5 mL) was inoculated with single bacterial colonies and incubated overnight at 37 °C on a rotary shaker (250 rpm). Overnight cultures were diluted in fresh LB to OD<sub>600</sub> of 0.05 (which corresponds to approximately 5.40\*10<sup>8</sup>–1.12\*10<sup>9</sup> CFU/mL for *E. coli* and to 1.13–2.30\*10<sup>9</sup> CFU/mL for *S. epidermidis*<sup>9</sup>) and then incubated at 37 °C, 250 rpm, until OD<sub>600</sub> reached 0.5–1.0. **dSQ<sup>+</sup>-Ubi** was added to the bacterial suspension in LB from 0.5 mM stock solutions in DMSO to the desired final concentrations of 1 µM. Samples were incubated for 10 min at 37 °C, then 5 µL of labeled bacterial culture were deposited in the middle of the well of a µ-Slide 8 Well Glass Bottom. The bacteria were covered with 40 µL of 1 % low-melting agarose in PBS kept at 42°C and then kept at room temperature. Fluorescence confocal microscopy experiments were performed on a Leica TCS SP8 microscope equipped with a HCX PL APO CS2 63x/1.40 OIL objective. The imaging was performed at 22 °C. **dSQ<sup>+</sup>-Ubi** was

excited with a 638 nm 30 mW laser at 1% (*E. coli*) or 3% (*S. epidermidis*) intensity and detected at 645–850 nm. The pinhole was set to 1 airy unit. The images were acquired as means of 2 scans of 1024 × 1024 size. All images were processed with ImageJ.

## 7. Flow cytometry analysis of bacteria and HEK 293T cells

**Model *E. coli* and *S. epidermidis*.** Bacteria in the logarithmic growth phase were used for the flow cytometry experiments. Two days before the experiment, glycerol stocks were streaked on LB-agar plates and incubated at 37 °C overnight. Fresh LB medium (5 mL) was inoculated with single bacterial colonies and incubated overnight at 37 °C on a rotary shaker (250 rpm). Overnight cultures were diluted in fresh LB to OD<sub>600</sub> of 0.05 (which corresponds to approximately 5.40×10<sup>8</sup>–1.12×10<sup>9</sup> CFU/mL for *E. coli* and to 1.13–2.30×10<sup>9</sup> CFU/mL for *S. epidermidis*<sup>9</sup>) and then incubated at 37 °C, 250 rpm, until OD<sub>600</sub> reached 0.5–1.0. Fluorophores and probes were added to the bacterial suspension in LB from 0.1 mM stock solutions in DMSO to the desired final concentrations of 1 µM. Samples were incubated for 10 min with shaking at 37 °C, then fixed by adding an equal volume of 8% solution of PFA in PBS to reach a final concentration of PFA 4% w/v. Samples were then diluted 10–100 times in PBS and analyzed on a BD FACSymphony/A1 flow cytometer. 20,000 cells per sample were counted at a low flow rate using a 640 nm laser and the APC detection filter (670/30 nm).

**HEK 293T cells.** HEK 293T cells grown to 60-80% confluence were detached with Accutase and resuspended in DMEM/F-12 medium without phenol red at a concentration of 10<sup>6</sup> cells·mL<sup>-1</sup>. Fluorophores and probes were added to the cell suspension from 0.1 mM stock solutions in DMSO to the desired final concentrations of 1 µM. Samples were incubated for 10 min at 37 °C, then directly analyzed on a BD FACSymphony/A1 flow cytometer. 20,000 cells per sample were counted at a low flow rate using a 640 nm laser and the APC detection filter (670/30 nm).

**Bacterial clinical isolates.** Clinical isolates of *K. oxytoca*, *E. cloacae*, *E. coli* and *S. aureus* from the collection of the GIPAM team at the Saint-Etienne University Hospital Center (France) were inoculated onto Columbia blood agar plates and incubated overnight at 37°C. Three colonies of each isolated strain were resuspended in 1 mL of PBS to reach an OD<sub>600</sub> of 0.5. To 200 µL of each suspension were added 2 µL of the 0.1 mM DMSO stock solution of **dsQ<sup>+</sup>-Ubi** to achieve a final concentration of 1 µM. The samples were incubated for 10 min at room temperature, then diluted 100 times in PBS and analyzed on a Cytex® Aurora flow cytometer. 30,000 cells per sample were counted at a low flow rate (15 µL/min) using a 640 nm laser and the R2 detection channel (670–688 nm).

*Data analysis.* Flow cytometry data were analyzed using RStudio (version 2022.7.2.576) with the *flowCore* package (version 2.14.0).<sup>10</sup> Plots were created using the *ggplot2* package (version 3.4.4).<sup>11</sup>

## 8. Flow cytometry analysis of patient urine samples

16 urine samples from patients with suspected UTIs at the Saint-Etienne University Hospital Centre (France) were enrolled in the study. Urine samples were collected from patients in BD Vacutainer Urine Culture & Sensitivity tubes (Becton, Dickinson and Co, USA). Cytological parameters such as hematuria, leucocyturia (significant positive threshold  $\geq 10^4$  cells·ml<sup>-1</sup>) were measured using the Iris iQ200 select Automated Urine Microscopy Analyzer.<sup>12</sup> 10  $\mu$ L calibrated bacteriological loop was used to inoculate a chromogenic agar plate (UTI Clarity Brilliance, ThermoScientific, UK). Plates were then incubated at 37°C for 24 hours. The rest of the urine samples were kept overnight at +4°C. MALDI-TOF MS System (MALDI Biotyper Sirius, Bruker Daltonics, Germany) was used for bacterial identification of suspected uropathogen colonies. The complete characterization of the collected urine samples (the parameters of hematuria and leucocyturia, the quantities and the nature of pathogens) is provided in Table S2.

The next day, 1  $\mu$ L of the 0.1 mM DMSO stock solution of **dSQ<sup>+</sup>-Ubi** was added to 100  $\mu$ L of each urine sample to achieve a final concentration of 1  $\mu$ M. The samples were stained with the probe for 10 min at room temperature, then directly analyzed on a Cytex® Aurora flow cytometer. 5  $\mu$ L of each sample were analyzed at a low flow rate (15  $\mu$ L/min) using a 640 nm laser and the R2 detection channel (670–688 nm). The same protocol was applied to the analysis of the unstained control urine samples.

Flow cytometry data were analyzed using RStudio (version 2022.7.2.576) with the *flowCore* package (version 2.14.0).<sup>10</sup> Plots were created using the *ggplot2* package (version 3.4.4).<sup>11</sup>

Initial gating was performed on an fsc\_h versus ssc\_h density plot with thresholds set to ssc\_h > 2000, ssc\_h < 300,000, fsc\_h > 2000, and fsc\_h < 300,000 to exclude debris and artifacts. Next, second gating was performed on an R2\_a versus ssc\_h density plot to separate stained and unstained cells. The optimal thresholds were identified for each sample by comparing the fluorescence intensities of stained and unstained control samples. Typically, the thresholds were set to R2\_a > 3,000; 5,000; 10,000 or 20,000.

Finally, we calculated the number of cells in the selected cell population and divided the number by 5, which gave us the estimate of the number of fluorescent bacteria per  $\mu$ L of urine sample.

## 9. Ethics

All experiments were performed in accordance with French bioethics law and were approved by the Ethics Committee of the University Hospital of Saint-Étienne (reference number IRBN492025/CHUSTE). Opt-out consent was obtained from all human participants involved in this study.

## 10. Generative AI statement

During the preparation of this work the authors used ChatGPT for polishing the initial draft of the manuscript, namely for correcting grammar errors, refining phrasing for clarity and conciseness, and suggesting alternative word choices. The authors reviewed and edited the generated content as needed and take full responsibility for the content of the publication.

## 11. References

- 1 I. A. Karpenko, M. Collot, L. Richert, C. Valencia, P. Villa, Y. Mély, M. Hibert, D. Bonnet and A. S. Klymchenko, Fluorogenic Squaraine Dimers with Polarity-Sensitive Folding As Bright Far-Red Probes for Background-Free Bioimaging, *J. Am. Chem. Soc.*, 2015, **137**, 405–412.
- 2 I. Shulov, Y. Arntz, Y. Mély, V. G. Pivovarenko and A. S. Klymchenko, Non-coordinating anions assemble cyanine amphiphiles into ultra-small fluorescent nanoparticles, *Chem. Commun.*, 2016, **52**, 7962–7965.
- 3 Y. Berthomé, J. Gerber, F. Hanser, S. Riché, N. Humbert, C. Valencia, P. Villa, J. Karpenko, O. Florès and D. Bonnet, Rational Design of Cyanine-Based Fluorogenic Dimers to Reduce Nonspecific Interactions with Albumin and Lipid Bilayers: Application to Highly Sensitive Imaging of GPCRs in Living Cells, *Bioconjugate Chem.*, 2024, **35**, 1182–1189.
- 4 A. Bunschoten, D. M. van Willigen, T. Buckle, N. S. van den Berg, M. M. Welling, S. J. Spa, H.-J. Wester and F. W. B. van Leeuwen, Tailoring Fluorescent Dyes To Optimize a Hybrid RGD-Tracer, *Bioconjug Chem*, 2016, **27**, 1253–1258.
- 5 A. R. Tyler, A. O. Okoh, C. L. Lawrence, V. C. Jones, C. Moffatt and R. B. Smith, N-alkylated 2,3,3-trimethylindolenines and 2-methylbenzothiazoles. Potential lead compounds in the fight against *Saccharomyces cerevisiae* infections, *Eur J Med Chem*, 2013, **64**, 222–227.
- 6 Y. Yadav, E. Owens, S. Nomura, T. Fukuda, Y. Baek, S. Kashiwagi, H. S. Choi and M. Henary, Ultrabright and Serum-Stable Squaraine Dyes, *J. Med. Chem.*, 2020, **63**, 9436–9445.
- 7 A. C. Tiberghien, S. J. Gregson, L. A. Masterson, J.-N. Levy, G. C. Kemp, L. R. Adams, N. V. Patel and P. W. Howard, An optimised synthesis of SG3376, a non-cleavable antibody-drug conjugate pyrrolobenzodiazepine drug-linker, *Tetrahedron Letters*, 2017, **58**, 4363–4366.
- 8 I. Texier, M. Goutayer, A. Da Silva, L. Guyon, N. Djaker, V. Josserand, E. Neumann, J. Bibette and F. Vinet, Cyanine-loaded lipid nanoparticles for improved in vivo fluorescence imaging, *J Biomed Opt*, 2009, **14**, 054005.
- 9 H. Pan, Y. Zhang, G.-X. He, N. Katagori and H. Chen, A comparison of conventional methods for the quantification of bacterial cells after exposure to metal oxide nanoparticles, *BMC Microbiol*, 2014, **14**, 222.

- 10 F. Hahne, N. LeMeur, R. R. Brinkman, B. Ellis, P. Haaland, D. Sarkar, J. Spidlen, E. Strain and R. Gentleman, flowCore: a Bioconductor package for high throughput flow cytometry, *BMC Bioinformatics*, 2009, **10**, 106.
- 11 H. Wickham, *ggplot2*, Springer International Publishing, Cham, 2016.
- 12 D. T. Wah, P. K. Wises and A. W. Butch, Analytic Performance of the iQ200 Automated Urine Microscopy Analyzer and Comparison With Manual Counts Using Fuchs-Rosenthal Cell Chambers, *Am J Clin Pathol*, 2005, **123**, 290–296.
